# Supplementary material for: Exploring Instagram To Promote Student Engagement in an Online Didactic Environment
Source: PubMed Central journal article supplement — J Microbiol Biol Educ. 2021 Mar 31;22(1):22.1.87. doi: 10.1128/jmbe.v22i1.2587 (PMC8060131; doi:10.1128/jmbe.v22i1.2587), 2021-03-31
Supplement: JMBE-22-87-S001a.pdf [file JMBE-22-87-S001a.pdf]

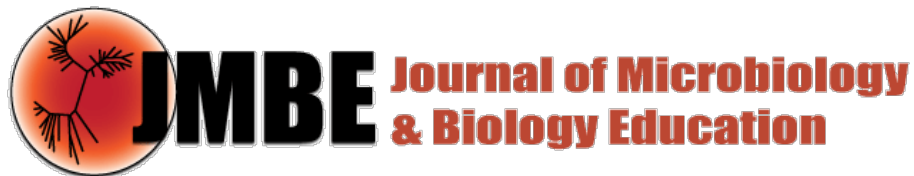

---

**Supplemental Materials**  
**for**  
**Exploring Instagram To Promote Student Engagement in**  
**an Online Didactic Environment**

Rohini Ganjoo\*, Lisa Schwartz, Yousif Barzani, and Marcia Firmani

*Department of Biomedical Laboratory Sciences, School of Medicine and Health Sciences,  
The George Washington University, Ashburn, VA 20147*

**Table of Contents**

(Total pages 11)

Appendix 1: Student recruitment e-mail

Appendix 2: Illustrative examples of Instagram posts

Appendix 3: Social media survey

\*Corresponding author. Mailing address: Department of Biomedical Laboratory Sciences, School of Medicine and Health Sciences, The George Washington University, 44983 Knoll Square, Ashburn, VA 20147. Phone: (202) 994-0278. E-mail: [rganjoo@gwu.edu](mailto:rganjoo@gwu.edu). Received: 24 December 2020, Accepted: 5 February 2021, Published: 31 March 2021

©2021 Author(s). Published by the American Society for Microbiology. This is an Open Access article distributed under the terms of the Creative Commons Attribution-Noncommercial-NoDerivatives 4.0 International license (<https://creativecommons.org/licenses/by-nc-nd/4.0/>) and <https://creativecommons.org/licenses/by-nc-nd/4.0/legalcode>), which grants the public the nonexclusive right to copy, distribute, or display the published work.

## **Appendix 1: Recruitment Email for Students**

You have been identified as a potential participant in a research study we are conducting to understand the benefits of using social media in distance learning. You have been asked to participate in this study because you are currently enrolled as a student at XYZ University.

Your participating will require you to answer a brief survey on your social media usage. You will also have the option to follow a selected social media account on Instagram for educational purposes. Data from the educational social media accounts, including clicks, shares, and posts, will be collected for research purposes even if you decide you do not want to take part in the survey. Although data will be tracked, it will not be linked to the individual.

Data concerning user identity will not be part of this proposed study. Both the survey data and social media account will be considered for research purposes only. You may refuse to participate in the study and you may stop your participation in this study at any time.

It is our hope that the results of the study will be detailed and submitted for publication.

Thank you.

## Appendix 2: Illustrative examples of Instagram posts

In Week 1 of the Microbial Pathogenesis course, a cartoon exploring the fun side of laboratory work was shared.

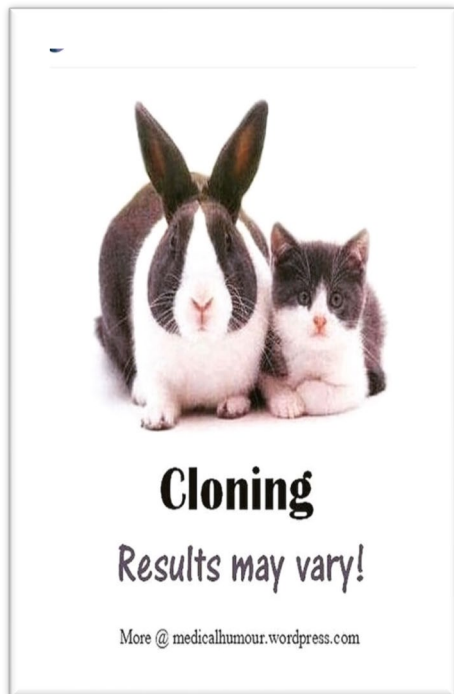

During Week 2 of the Molecular Diagnostics course, DNA replication was covered, students were asked to identify the key enzymes in the process.

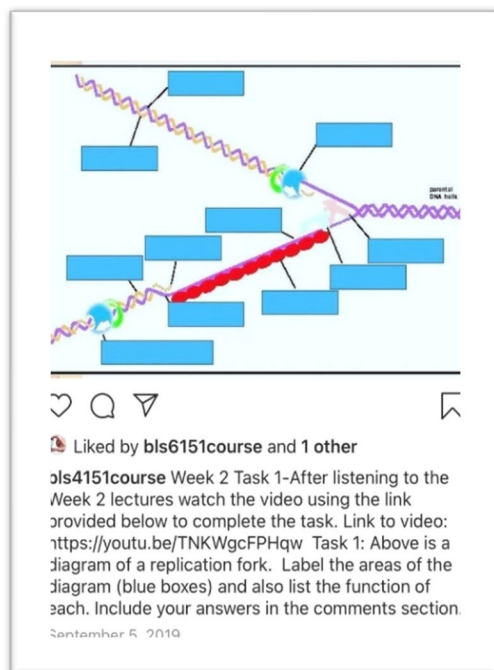

In Week 3 of Molecular Diagnostics course, students were tasked with applying information from the genetic code to generate the sequence of amino acids in a protein.

**bls4151course**

|                |     | Second position of codon |               |           |        |               |           |          |            |
|----------------|-----|--------------------------|---------------|-----------|--------|---------------|-----------|----------|------------|
|                |     | U                        |               | C         |        | A             |           | G        |            |
| First position | U   | UUU                      | Phenylalanine | UCU       | Serine | UAU           | Tyrosine  | UGU      | Cysteine   |
|                |     | UUC                      |               | UCC       |        | UAC           |           | UGC      |            |
|                |     | UUA                      | Leucine       | UCA       |        | UAA           | Ter (end) | UGA      | Ter (end)  |
|                |     | UUG                      |               | UGG       |        | UAG           | Ter (end) | UGG      | Tryptophan |
| C              | CUU | Leucine                  | CCU           | Proline   | CAU    | Histidine     | CGU       | Arginine |            |
|                | CUC |                          | CCC           |           | CAC    |               | CGC       |          |            |
|                | CUA |                          | CCA           |           | CAA    | Glutamine     | CGA       |          |            |
|                | CUG |                          | CCG           |           | CAG    |               | CGG       |          |            |
| A              | AUU | Isoleucine               | ACU           | Threonine | AAU    | Asparagine    | AGU       | Serine   |            |
|                | AUC |                          | ACC           |           | AAC    |               | AGC       |          |            |
|                | AUA |                          | ACA           |           | AAA    | Lysine        | AGA       | Arginine |            |
|                | AUG | Methionine               | ACG           |           | AAG    |               | AGG       |          |            |
| G              | GUU | Valine                   | GCU           | Alanine   | GAU    | Aspartic acid | GGU       | Glycine  |            |
|                | GUC |                          | GCC           |           | GAC    |               | GGC       |          |            |
|                | GUA |                          | GCA           |           | GAA    | Glutamic acid | GGA       |          |            |
|                | GUG |                          | GCG           |           | GAG    |               | GGG       |          |            |

♡ 💬 🚩

**bls4151course** Week 3 Task 1. The Genetic Code. This activity is geared to help you properly use the genetic code. Using the code here, what would the amino acid sequence be for the following mRNA nucleotide sequence?

MRNA sequence:

AUG GUG GCG GGG GAA UUG UAA | Post your answers in the comments section and earn a star 🌟

View all 5 comments

**bls6216course**

### MICROBIOLOGIST PICK-UP LINES

Are you community acquired pneumonia? Because you're taking my breath away. @bls6216course

You make me wanna be the Herpes virus; forever on your lips. @twisteddoodles

Girl, are you influenza? Because when I'm around you I'm all hot and confused.

You're like sepsis, because you're so a-cute.

If you were an antibiotic then I'd be a susceptible bacteria because I can't resist you.

You are like vaccination shots I want to fake you in my arms.

♡ 💬 🚩

7 likes

**bls6216course** In support of Valentine's Day and just being so cute, thought I'd share these with all of you! For more of such cuteness @ [https://instagram.com/twisteddoodles?](https://instagram.com/twisteddoodles?gshid=1syasrbh9fyx)

In Week 4 of the Microbial Pathogenesis course, memes were shared.

While explaining antibiotic resistance in Week 5 of Microbial Pathogenesis, the role of biofilms in the process was highlighted in the post.

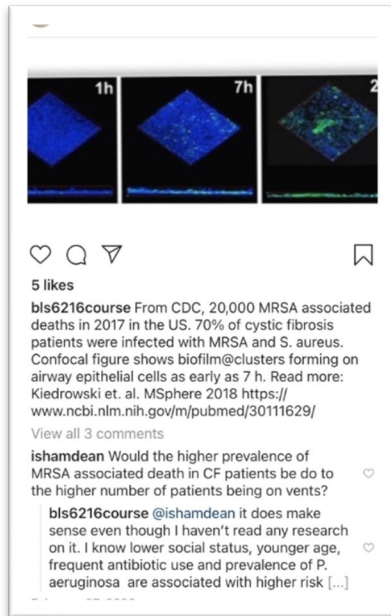

In the Microbial Pathogenesis course, a mechanism of coronavirus pathogenesis by causing endoplasmic reticulum stress was reinforced during Week 6.

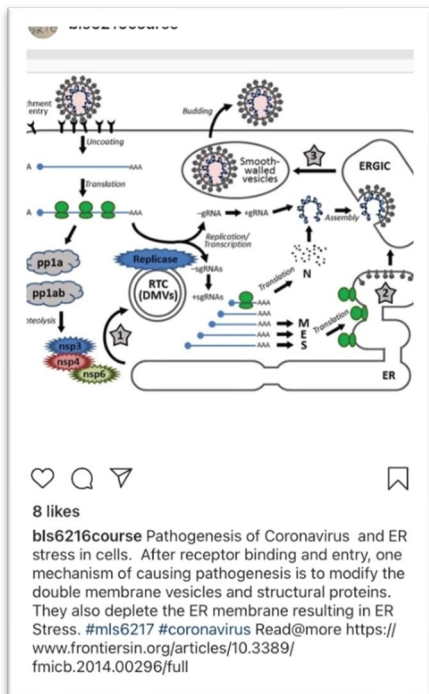

During week 7 of the Advanced Immunology and Serology course, the serological response to the Epstein-Barr virus was highlighted.

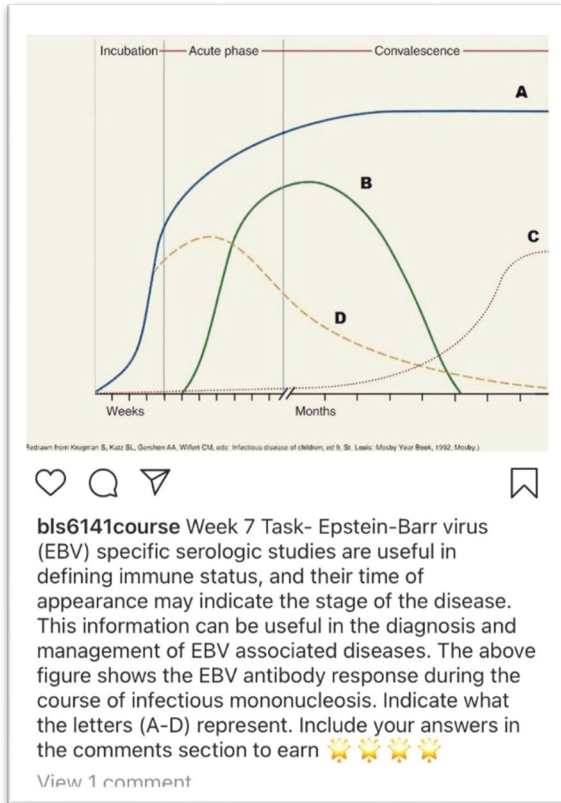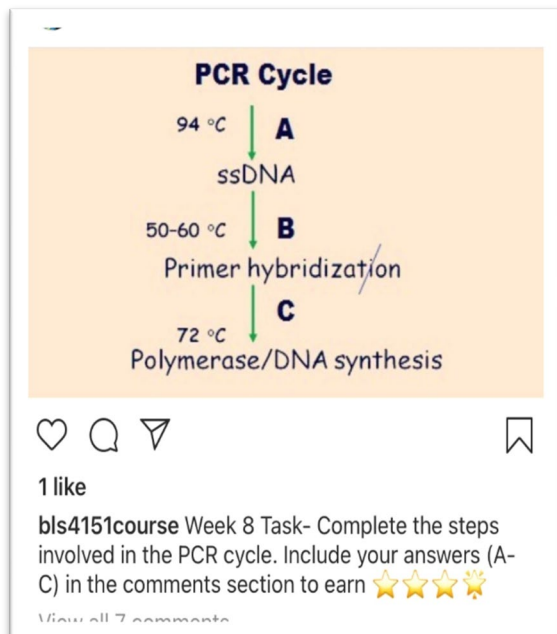

Below, in Week 8 of the Molecular Diagnostics course, student comprehension of the PCR cycle steps was queried.

In another, Week 8 post in the Advanced Immunology and Serology course, students were encouraged to utilize laboratory results to analyze test results.

| Tests        | Results | Interpretation                                                |
|--------------|---------|---------------------------------------------------------------|
| HBsAg        | 1       | Susceptible ( Vaccinate)                                      |
| Anti-HBc     | 2       |                                                               |
| Anti-HBs     | 3       |                                                               |
| HBsAg        | 4       | Immune because of natural infection ( Resolved HBV infection) |
| Anti-HBc     | 5       |                                                               |
| Anti-HBs     | 6       |                                                               |
| HBsAg        | 7       | Immune because of hepatitis B vaccination                     |
| Anti-HBc     | 8       |                                                               |
| Anti-HBs     | 9       |                                                               |
| HBsAg        | 10      | Acutely infected                                              |
| Anti-HBc     | 11      |                                                               |
| Anti-HBc IgM | 12      |                                                               |
| Anti-HBs     | 13      |                                                               |
| HBsAg        | 14      | Chronically infected                                          |
| Anti-HBc     | 15      |                                                               |
| Anti-HBc IgM | 16      |                                                               |
| Anti-HBs     | 17      |                                                               |

❤️ 💬 🗑️ 📌

**bls6141course** Week 8 Task-This is a table of Hepatitis B Panel. Complete the Results section by indicating wether the serologic markets would be positive or negative. Include your answers in comments section to earn 🌟🌟🌟🌟

[View 1 comment](#)

In the Advanced Immunology and Serology course, the importance of laboratory techniques to diagnose immune disorders was covered in Week 9 and reinforced with this post.

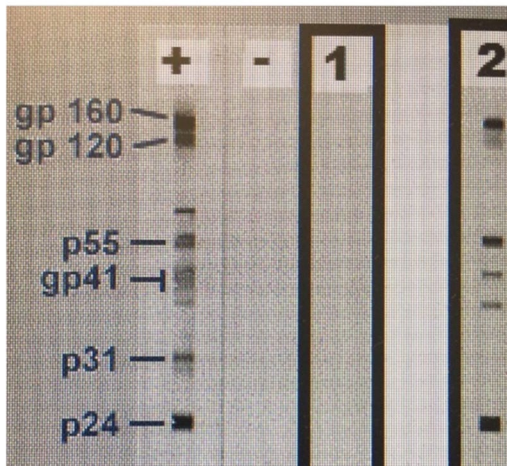

The image shows a Western blot assay for HIV-1 serodiagnosis. The blot has four lanes labeled '+', '-', '1', and '2'. On the left side, there are six protein targets labeled with arrows: gp 160, gp 120, p55, gp41, p31, and p24. Lane '+' shows a positive control with bands for all six targets. Lane '-' shows a negative control with no bands. Lane '1' shows a patient sample with bands for gp 160, gp 120, p55, gp41, p31, and p24. Lane '2' shows a patient sample with bands for gp 160, gp 120, p55, gp41, p31, and p24.

bls6141course Week 9 Task- This is a figure of Western blot assay for serodiagnosis of HIV-1 infection. Interpret the Western blot assay results for patients 1 and 2. Write your answer in the comments section to earn 🌟🌟🌟🌟

In the Genetics course, the importance of genetic counselors was emphasized and promoted in Week 10.



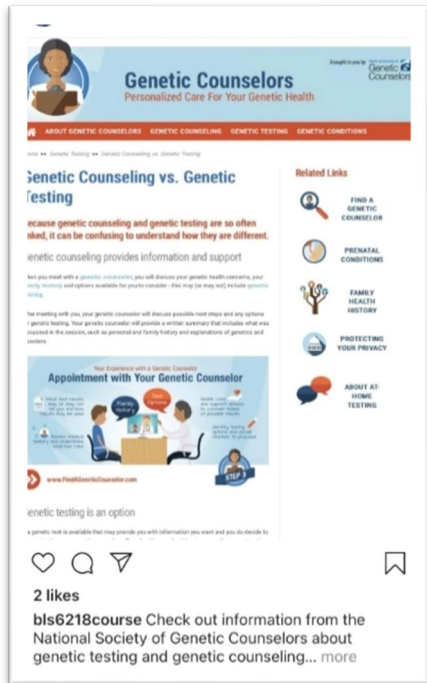

In Week 12 of the Genetics course, students were asked to solve a genetics problem applying the concepts of linked genes.

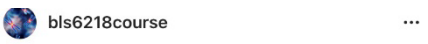

Individuals heterozygous for dominant and recessive alleles of two linked genes are crossed with others who are homozygous recessive for both genes. The number of offspring's observed among 640 progeny are as follows:  
 AB/ab 95  
 Ab/ab 216  
 aB/ab 232  
 Ab/ab 97  
 What is the frequency of recombination between the genes?

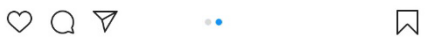

Liked by bls6141course and 2 others

bls6218course Thomas Hunt Morgan born in Kentucky discovered linked genes. Second Image: Calculate the frequency of... more

### Appendix 3: Social Media Survey

1. Sex  
Male / Female
2. Age  
20-24/ 25-29/ 30-34/ 35-39/ 40-44/ 45-49/50-54/55-60
3. Do you work?  
More than 40 hours per week / 20 – 40 hours per week / 10 – 20 hours per week/ Less than 10 hours per week
4. Do you currently use social networking sites (social media)?  
Yes/No
5. If Yes, which platforms do you use? (Check all that apply)  
Facebook /Twitter / Instagram/ Tumbler / YouTube / SnapChat / Pinterest / Google + /  
Reddit/Other
6. Do use social networking sites for educational purposes? Yes / No
7. If Yes, which platforms do you use for educational purposes? (Check all that apply)  
Facebook /Twitter / Instagram/ Tumbler / YouTube / SnapChat / Pinterest / Google + /  
Reddit/Other
8. If you don't use social media for medical education purposes, why not (check all that apply)?  
Privacy issues/ waste of time/ distraction/ not suitable for education
9. During the Spring 2019 course, on average I viewed the Instagram course feeds:  
Rarely / Few times per month / Few times per week / Few times per day/ Few times per hour
10. During the Spring 2019 course, on average I engaged in discussions on Instagram course feeds:  
Rarely / Few times per month / Few times per week / Few times per day/ Few times per hour

11. The Instagram course feeds was a valuable way to receive feedback on my learning:  
Strongly disagree / Disagree / Neutral / Agree / Strongly Agree
12. The Instagram course feeds allowed me to stay engaged with my Instructor and peers.  
Strongly disagree / Disagree / Neutral / Agree / Strongly Agree
13. Which of the following aspects of the Instagram course feeds did you find especially useful in stimulating your learning (check all that apply)  
Exam type questions/ explanatory comments/ post-lecture questions/ videos/ books or article recommendations/ course-related humor
14. The Instagram course feeds boosted my morale/lifted my spirits during learning:  
Strongly disagree / Disagree / Neutral / Agree / Strongly Agree
15. The Instagram course feeds made it easier to communicate/engage with teachers:  
Strongly disagree/ Disagree / Neutral / Agree / Strongly Agree
16. The Instagram course feeds made it easier to communicate/engage with my peers  
Strongly disagree/ Disagree / Neutral / Agree / Strongly Agree
17. The Instagram course feeds was a useful adjunct to learning this semester :  
Strongly disagree/ Disagree / Neutral / Agree / Strongly Agree
18. I would like to see social media sites used in future distance learning:  
Strongly disagree/ Disagree / Neutral / Agree / Strongly Agree
19. Please use this space to provide any additional comments regarding the Instagram course feeds.
